# Supplementary material
Source: Elsevier journal article supplement (https://www.sciencedirect.com/science/article/pii/S0048712020300761)
Supplement: mmc1 [file S0048712020300761:mmc1.doc]

**Apéndice 1**

**Escala de valoración**:

SI: Lo realiza sin dificultad. NO: Lo realiza parcialmente o no lo realiza.

SI: Tiempo cronometrado de la actividad de desplazarse igual al tiempo de doble tarea cognitivo.

NO: Hay cambios en el tiempo cronometrado de la actividad doble tarea cognitiva frente a la actividad de desplazarse sin tarea cognitiva

| **Dimensión:** Equilibrio dinámico funcional | | | | | |
| --- | --- | --- | --- | --- | --- |
| Contexto: Para las siguientes actividades necesita: Una silla sin reposabrazos, donde las caderas y rodillas queden a 90°. Dos láminas de 10cm ancho x 10cm largo con un dibujo de un cepillo de peinar y la otra con un dibujo de jabón de tocador. Un objeto que pueda agarrar el usuario (zapato). | | | | | |
| Instrucción: Para esta actividad se debe ubicar una silla a 80 cm de distancia de la pared. Estando la persona de pie, ubicar una lámina (cepillo de peinar) en la pared a la altura de los ojos del usuario, y ubicar la otra lámina a 40 cm de la parte superior de la otra. (Figura 1) | | | | | |
| **Ítems** | **SI** | **NO** | 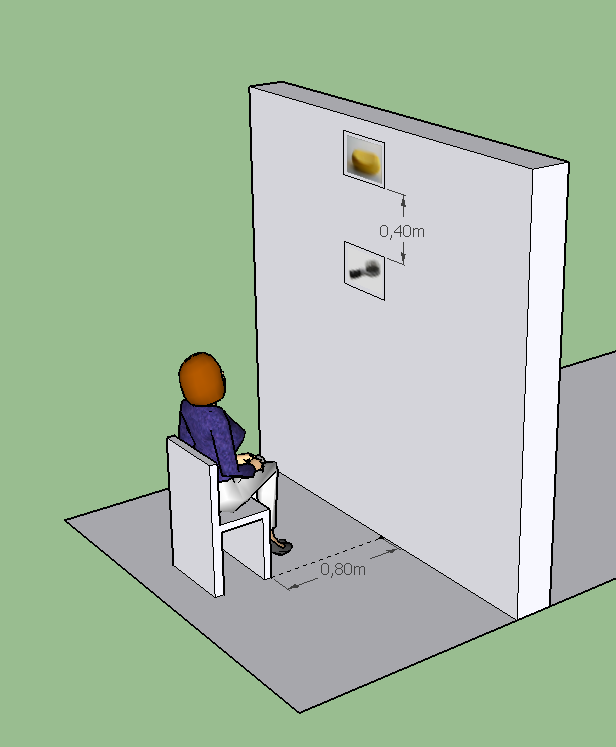 | | |
| 1. La persona debe estar sentado en la silla, y dar la instrucción de: Levántese de la silla, sin sujetarse de ella, toque con su mano la lámina que está en frente de usted. (Tocar la lámina del cepillo que está a la altura de sus ojos) |  |  |
| 2. La persona debe estar sentada en la silla, dar la instrucción de: Levántese de la silla, sin sujetarse de ella, levante su brazo por encima de la cabeza y toque la lámina (jabón de tocador). |  |  |
| Para esta actividad se debe ubicar una silla sin reposabrazos, donde las caderas y rodillas queden a 90°, a 1 metro de distancia ubicar al lado derecho la lámina del cepillo de peinar y al lado izquierdo la lámina del jabón de tocador. (Figura 2) | | | | | |
| 3. La persona debe estar sentada en la silla y dar la instrucción de: Levántese de la silla, sin sujetarse de ella, camine dos pasos en línea recta, pare, mire la lámina que está ubicada al lado derecho de usted y diga que figura observa. |  |  | 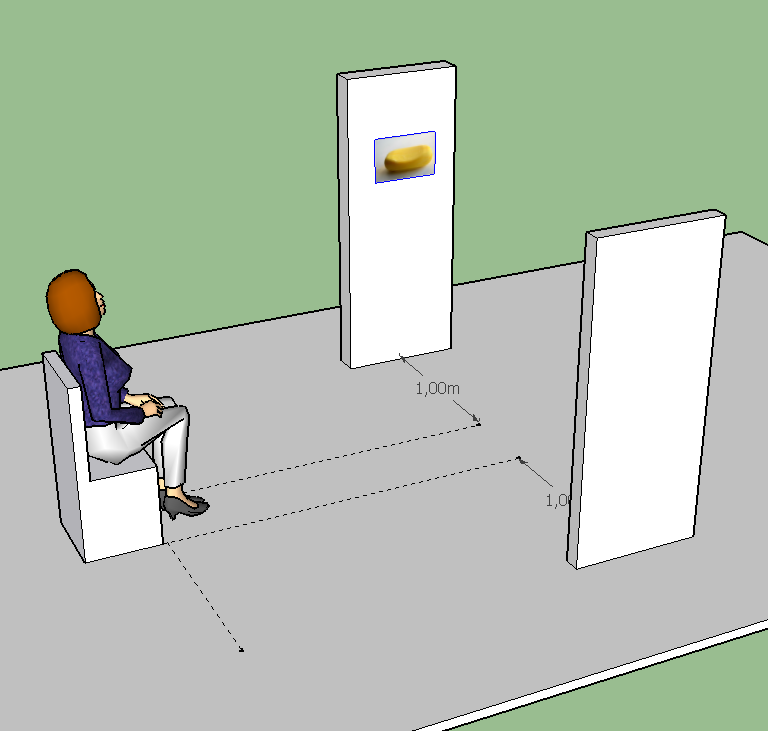 | | |
| 4. La persona debe estar sentada en la silla y dar la instrucción de: Levántese de la silla, sin sujetarse de ella, camine dos pasos, pare y mire la lámina que está ubicada al lado izquierdo de usted y diga que figura observa. |  |  |
| Para esta actividad la persona a evaluar debe estar de pie. Ubicar 3 metros de distancia en línea recta. Demarque el punto de inicio y final de los 3 metros. A los 3 metros de distancia del punto de partida de la persona ubicar en el piso un objeto(zapato). | | | | | |
| 5. La persona debe estar de pie en el punto de inicio, y dar la instrucción de: Camine en línea recta, cuando llegue al zapato, agáchese y recójalo.  Si____ No _____ | | | | | |
| Contexto: En estas actividades se desarrollan tareas de vestido. Elementos necesarios: una camisa y un zapato. | | | | | |
| Instrucción: Para esta actividad la persona a evaluar debe estar de pie. Ubicar una silla sin reposabrazos, donde las caderas y rodillas queden a 90°, esta debe estar en frente de la persona. Al lado de derecho o izquierdo de la silla ubicar el zapato. | | | | | |
| 6. La persona debe estar de pie, ubicada enfrente de la parte delantera de la silla y se da la indicación de: Siéntese en la silla, estando sentado, recoja el zapato que está en el piso, y póngase el zapato. (Figura 3) |  |  | 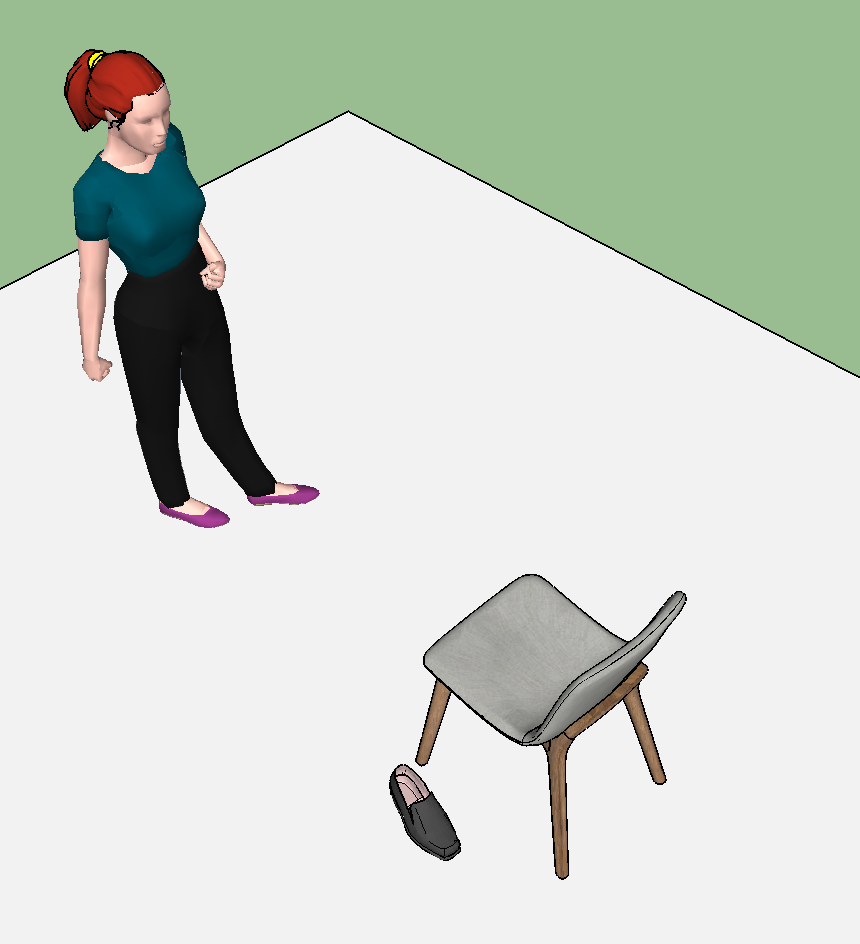 | | |
| Para esta actividad la persona a evaluar debe estar de pie. Ubicar 3 metros de distancia en línea recta. Demarque el punto de inicio y final de los 3 metros. A los 3 metros de distancia ubicar una silla, y sobre el espaldar de la silla ubicar una camisa. (Figura 4)  7. La persona debe estar de pie, ubicada en el punto de partida demarcado. Indicación: Camine en línea recta hasta la silla, coja la camisa y ahora póngasela permaneciendo de pie. |  |  | 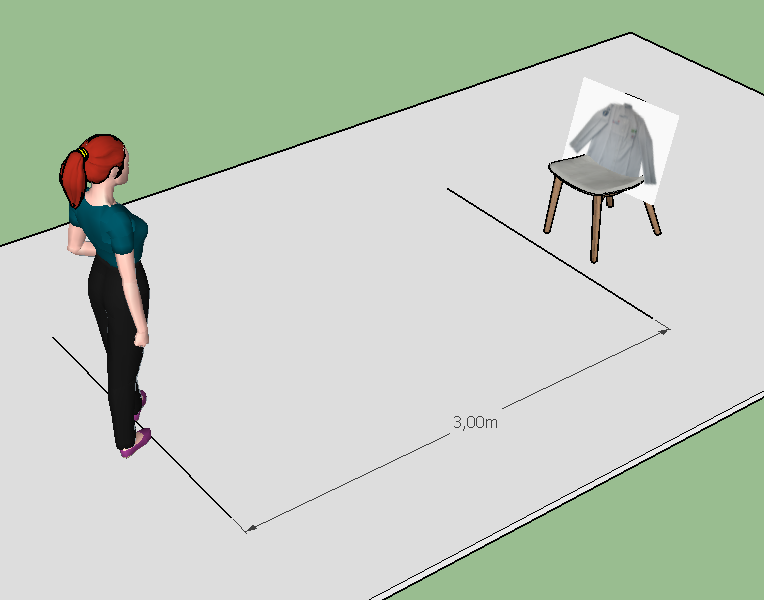 | | |
| **Dimensión: Perturbaciones Externas: Condiciones ambientales- Integración con objetos** | | | | | |
| Contexto: Para esta actividad son necesarios los siguientes elementos: 2 personas, 2 sillas, y objetos (ejemplo: 1 balón, 1 zapato, 1 juguete). | | | | | |
| Para esta actividad la persona a evaluar debe estar de pie. Ubicar 3 metros de distancia en línea recta. Demarque el punto de inicio y final de los 3 metros. A los 3 metros de distancia se deben ubicar dos personas, una al lado de la otra, separadas a 50 cm. | | | | | |
| 8. La persona debe estar de pie, ubicada en el punto de inicio de los 3 metros. Se da la indicación de: Camine en línea recta hasta donde están las personas, no parar y pasar en medio de ellas. (Figura 5) | si | no | 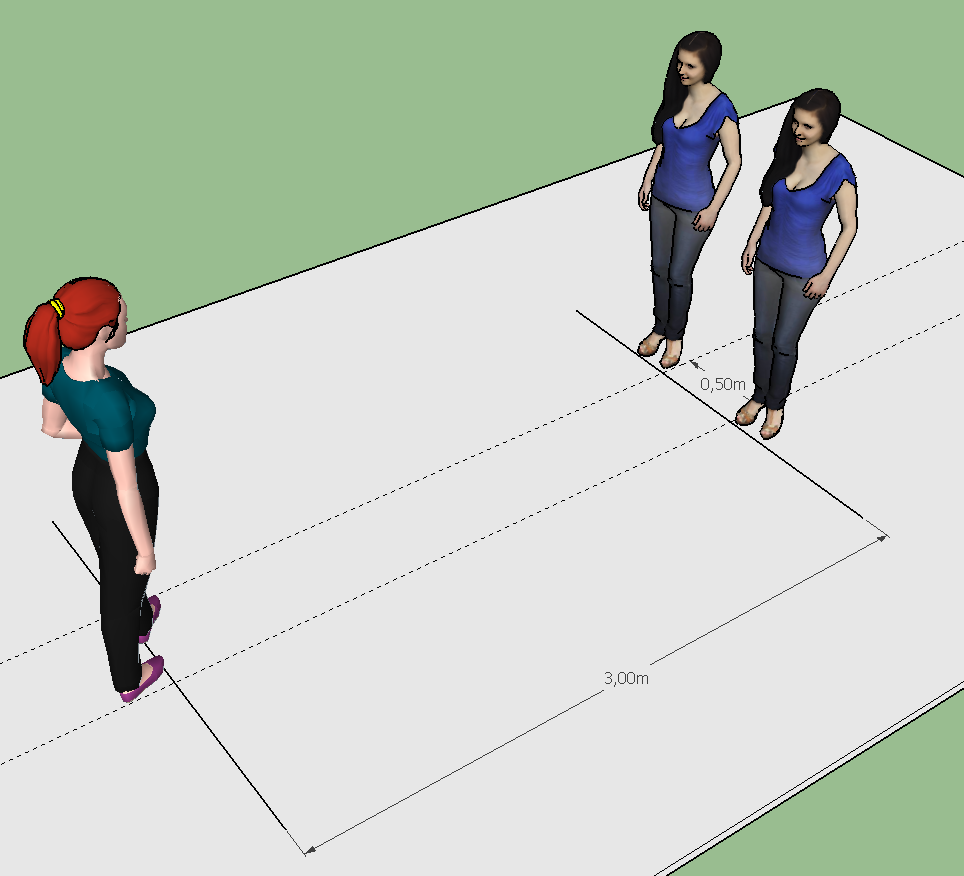 | | |
|  |  |
| Para esta actividad la persona a evaluar debe estar de pie. Ubicar 3 metros de distancia en línea recta. Demarque el punto de inicio y final de los 3 metros. A los 3 metros de distancia se deben ubicar dos personas, una al lado de la otra, separadas a 50 cm. Estas personas deben caminar en línea recta en dirección donde se encuentra la persona evaluada. | | | | | |
| 9.La persona debe estar de pie, ubicada en el punto de inicio de los 3 metros, se da la indicación de: Camine en línea recta hacia las personas que se encuentran delante de usted (trate de no chocarse con ellas) NO pare y siga caminado hasta que yo le diga ¡Pare¡ (Figura 5) | | | | 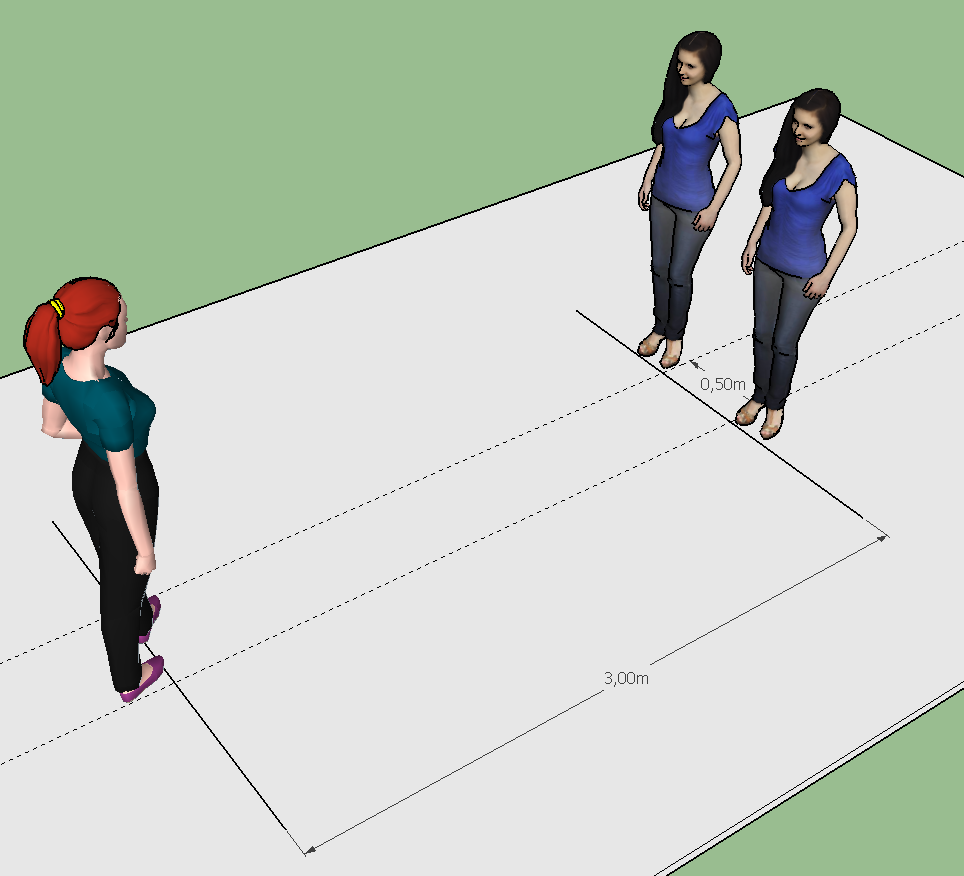 | |
| Contexto: Para esta actividad la persona a evaluar debe estar de pie. Ubicar 3 metros de distancia en línea recta. Demarque el punto de inicio y final de los 3 metros. | | | | | |
| Instrucción: Ubicar en este espacio 1 zapato a una distancia de 1 metro del punto de partida, 50 cm después 1 balón, y 50 cm del balón un juguete. (Figura 6). | | | | | |
| 10. La persona debe estar de pie, ubicada en el punto de inicio de los 3 metros, se da la indicación de: Camine por el espacio señalado, pase haciendo un zig-zag entre los objetos que se encuentran en el piso, no pare, y siga caminado hasta el punto final. |  |  | 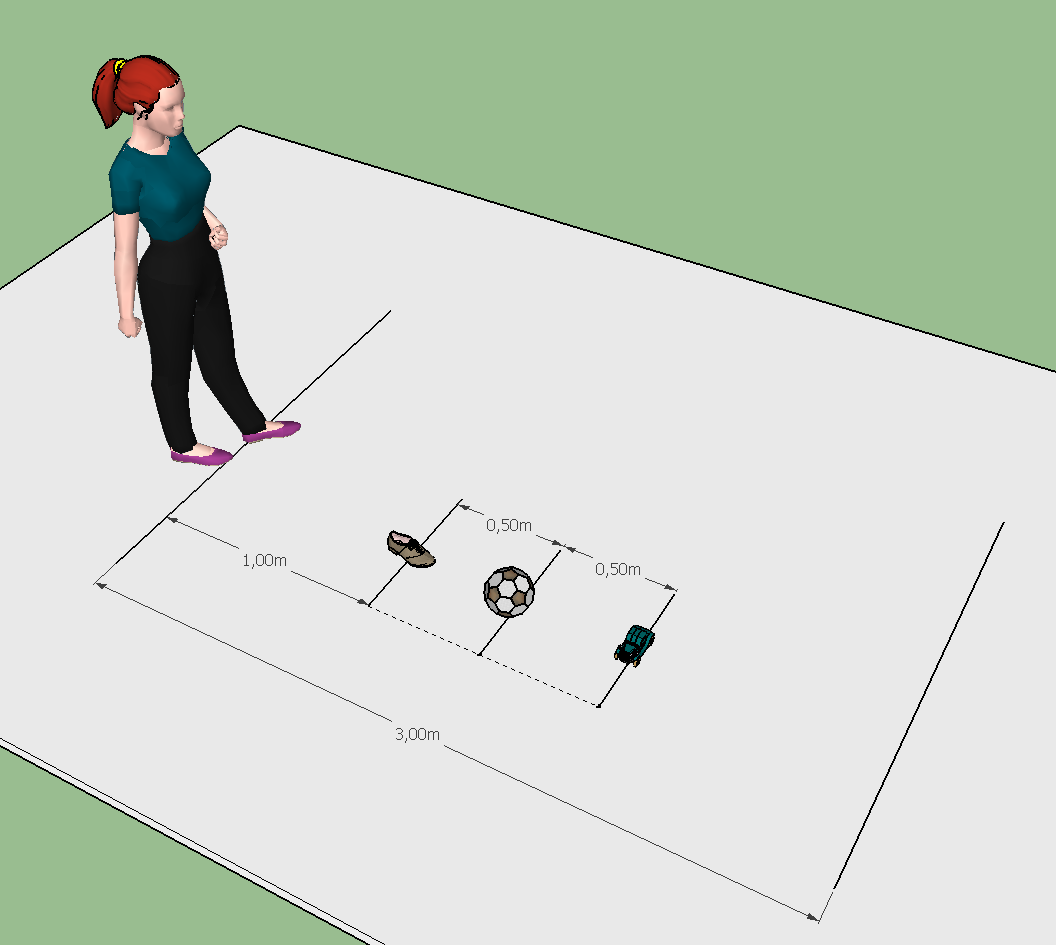 | | |
| Contexto: Para esta actividad la persona a evaluar debe estar de pie. Ubicar 3 metros de distancia en línea recta. Demarque el punto de inicio y final de los 3 metros. | | | | | |
| Instrucción Ubicar a 1metros del punto de partida de los 3 metros 2 sillas, una al lado de la otra separada 1 metro. (Figura 7). | | | | | |
| 11. La persona debe estar de pie, ubicada en el punto de inicio de los tres metros, se da la indicación de: Camine en línea recta pase entre las sillas. No debe tocarlas ni rozar su cuerpo con las sillas. |  |  | 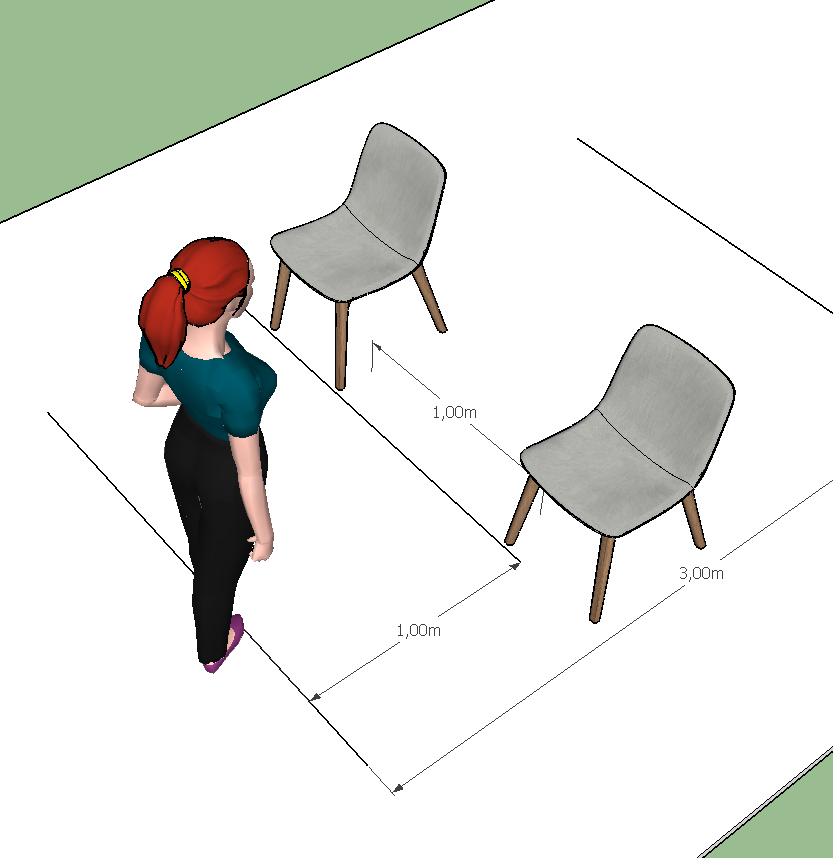 | | |
| **Dimensión: Perturbaciones Externas Terrenos o Superficies** | | | | | |
| **Contexto:** Para el desarrollo de las siguientes actividades utilice los siguientes reactivos: 1 banco de 10 cm de alto, 50cm de largo x 50 cm ancho y una rampa de 10cm de altura, 50cm de base y 50cm de ancho. Ubicar 4 metro de distancia en línea recta. Demarque el punto de inicio y final de los 4 metros. | | | | | |
| Instrucción: Ubicar en este espacio a 1 metro de distancia del punto de inicio de los 4 metros el banco. Para esta actividad como alternativa si es posible pueden salir a un espacio que tenga andenes y rampas. | | | | | |
| 12. La persona debe estar de pie, ubicada en el punto de inicio de los 4 metros, se da la instrucción de: Camine en línea recta, pase por encima del banco, siga caminado hasta la línea final. O reemplazar por camine y suba el andén y siga caminando. (Figura 8). |  |  | 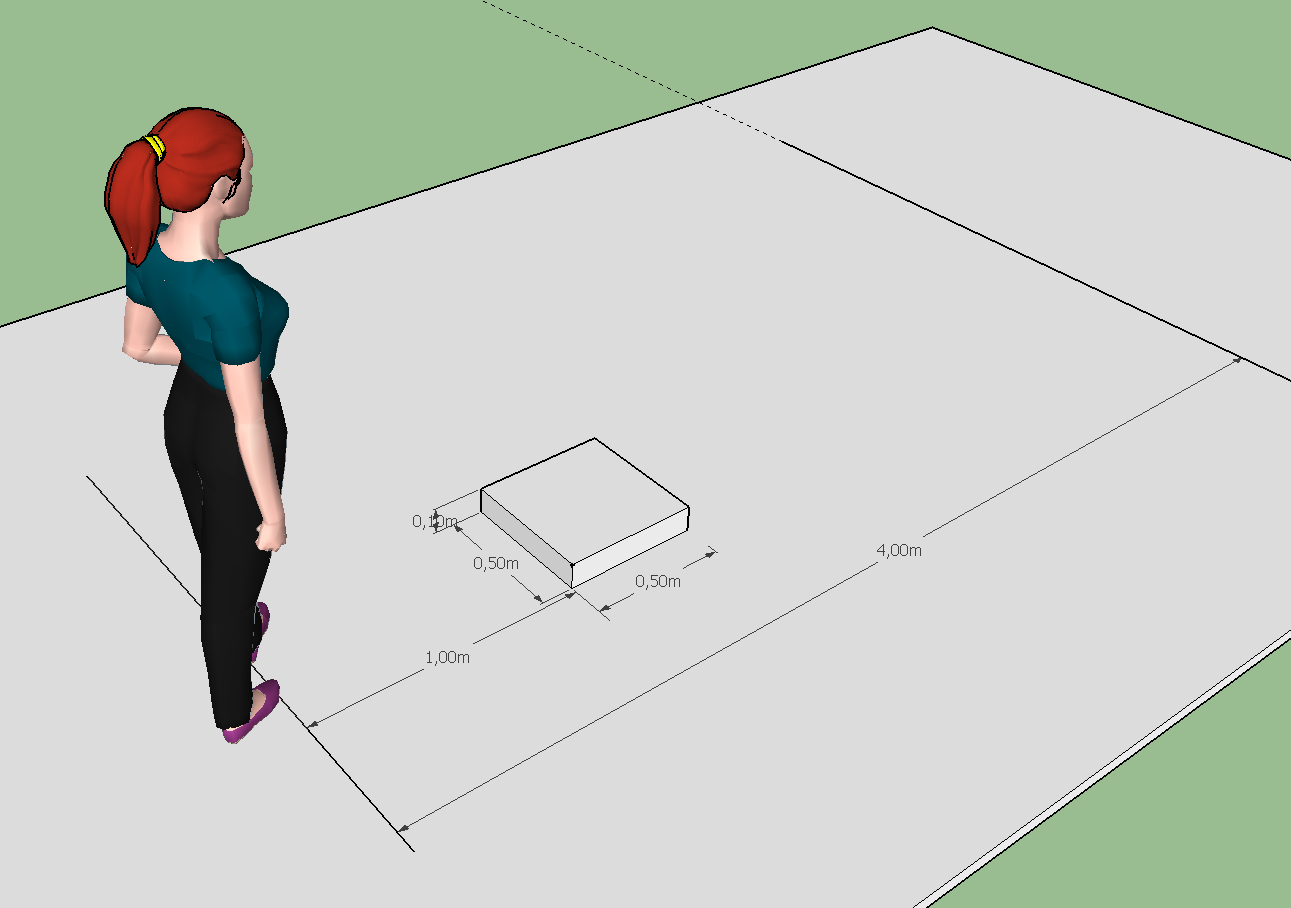 | | |
| Instrucción: Ubicar en este espacio a 1 metro de distancia del punto de inicio de los 4 metros el banco, y a 1 metro del banco la rampa. (Figura 9). | | | | | |
| 13. La persona debe estar de pie, ubicada en el punto de inicio de los 4 metros. Se da la indicación de: Camine en línea recta, pase por encima del banco y luego pase sobre la rampa. |  |  | 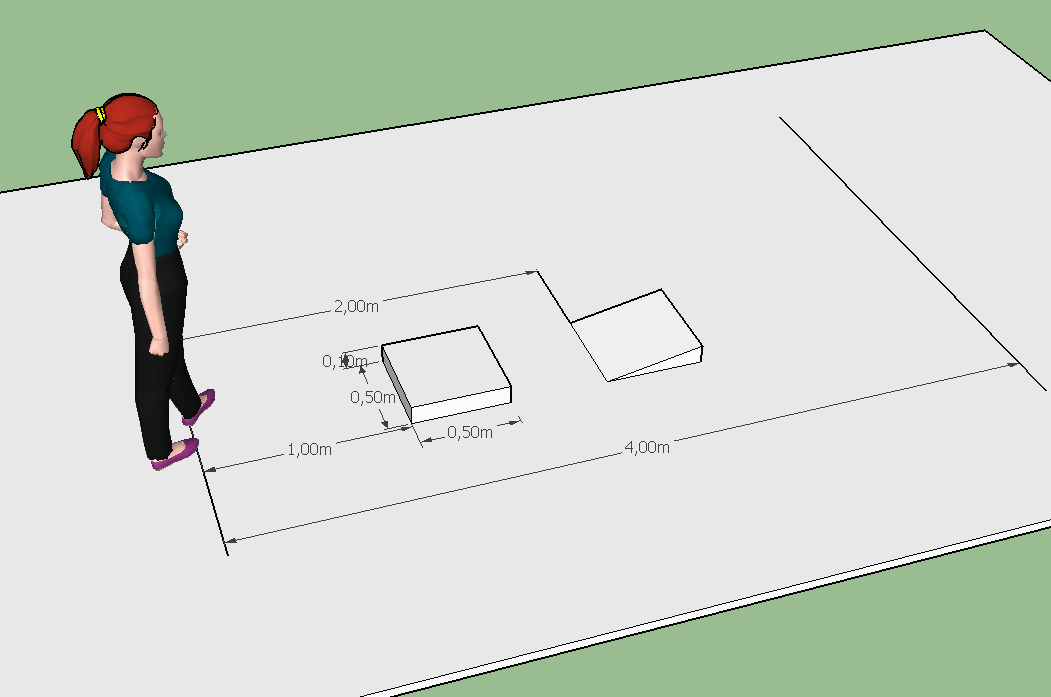 | | |
| Instrucción Para esta actividad el evaluador puede ubicar un espacio donde encuentre escaleras o puede utilizar una escalerilla de dos pasos (20cm de alto). Ubicar en este espacio a 1 metro de distancia del punto de inicio de los 4 metros la escalera. (Figura 10). | | | | | |
| 14. La persona debe estar de pie, se da la indicación de: Camine tres pasos en línea recta, y suba un escalón de la escalera. |  |  | 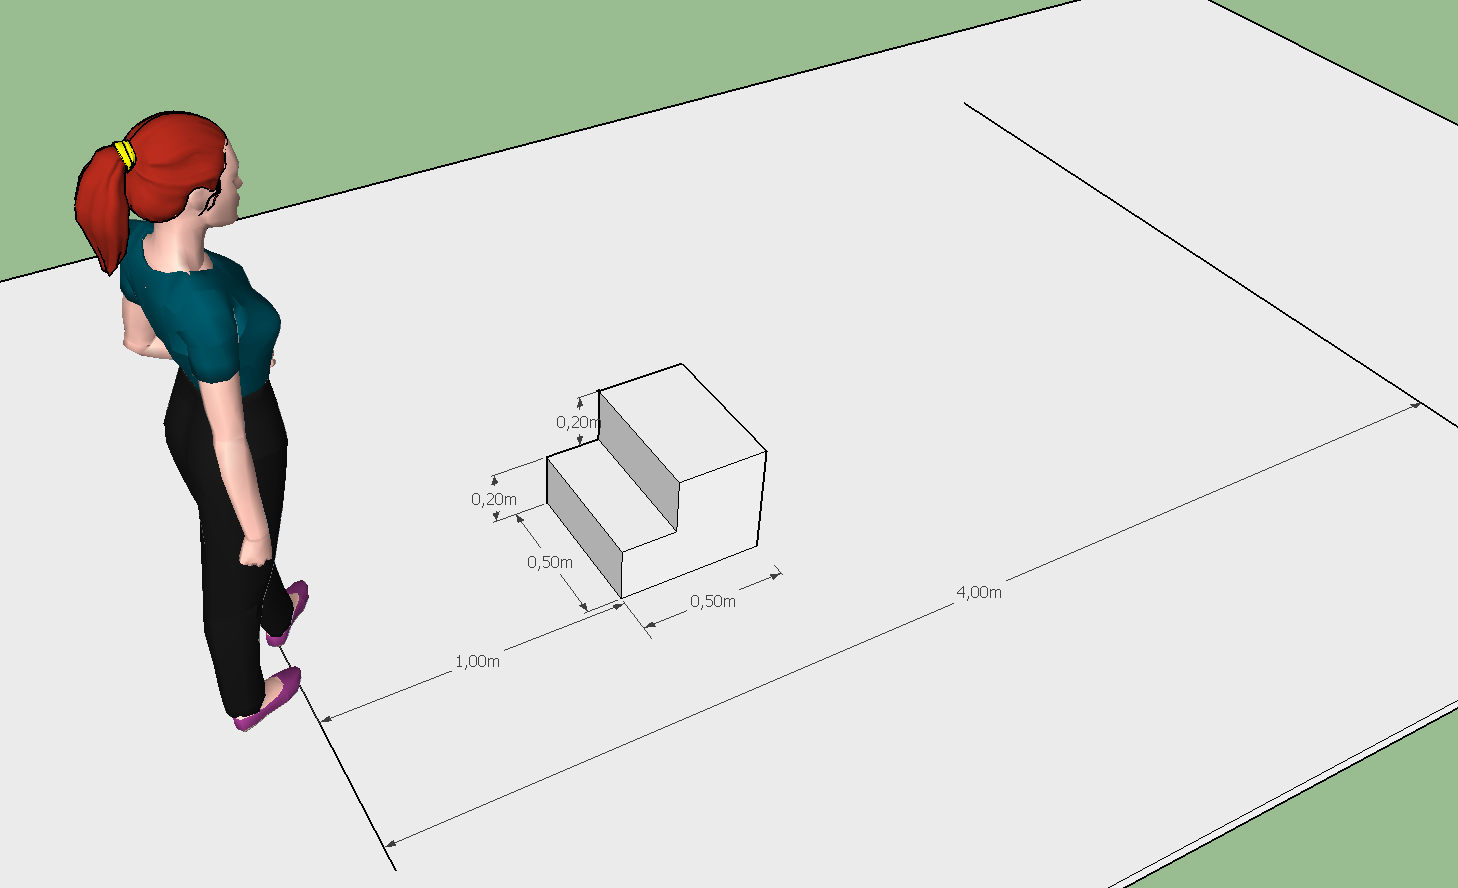 | | |
| **Dimensión: Tarea Dual Cognitiva** | | | | | |
| Contexto: Para esta actividad, ubicar 3 metros de distancia en línea recta. Demarque el punto de inicio y final de los 3 metros. Dar la instrucción de: Levantarse de la silla, caminar hasta el punto señalado (demarcación de los 3 metros), girar, regresar y sentarse de nuevo. Se debe cronometrar el tiempo desde que la persona se levanta de la silla, camina, regresa y se sienta de nuevo. | | | | | |
| Instrucción: Luego se le solicita realizar la misma actividad con las tareas cognitivas que se mencionan a continuación. Se debe cronometrar el tiempo desde que la persona se levanta de la silla, camina, regresa y se sienta de nuevo ejecutando la tarea cognitiva realizada. Es necesario que antes de levantarse la persona de la silla se le debe explica la tarea cognitiva a realizar. | | | | | |
| 15. Mientras camina la persona, se da la siguiente instrucción: Tóquese la nariz, tóquese la cabeza, tóquese el estómago. | | | | Tiempo: | |
| si | no |
|  |  |
| 16. Mientras camina la persona, se da la siguiente instrucción: cante una canción. | | | |  |  |
| 17. Mientras camina, nombre 3 cosas que usted utiliza para el aseo personal. | | | |  |  |
| 18. Mientras camina, usted debe dar el opuesto de estas palabras. Antes de iniciar la actividad se explica la tarea a realizar y se da un ejemplo: feo - bonito: Ahora se da la indicación de: Mientras camina nombre el opuesto de: Grande- Pequeño, Feliz - triste, Lejos-Cerca, Frio-caliente | | | |  |  |
| 19. La persona debe estar sentada y atento a la indicación: Imagínese que para preparar el almuerzo usted debe comprar los siguientes ingredientes: arroz, plátano, cebolla y carne. Recuerde muy bien estos ingredientes porque ahora se los voy a preguntar. Se da la instrucción de: levántese de la silla, camine y responda: ¿cuáles son esas cosas que debe comprar para el almuerzo? | | | |  |  |
